# Supplementary material for: Coffee Consumption and the Risk of Colorectal Cancer
Source: Oxford University Press journal article supplement (doi:10.1158/1055-9965.epi-15-0924), 2016-03-31
Supplement: 10559965epi150924-sup-154656_2_supp_3262070_nz41bt.docx [file 10559965epi150924-sup-154656_2_supp_3262070_nz41bt.docx]

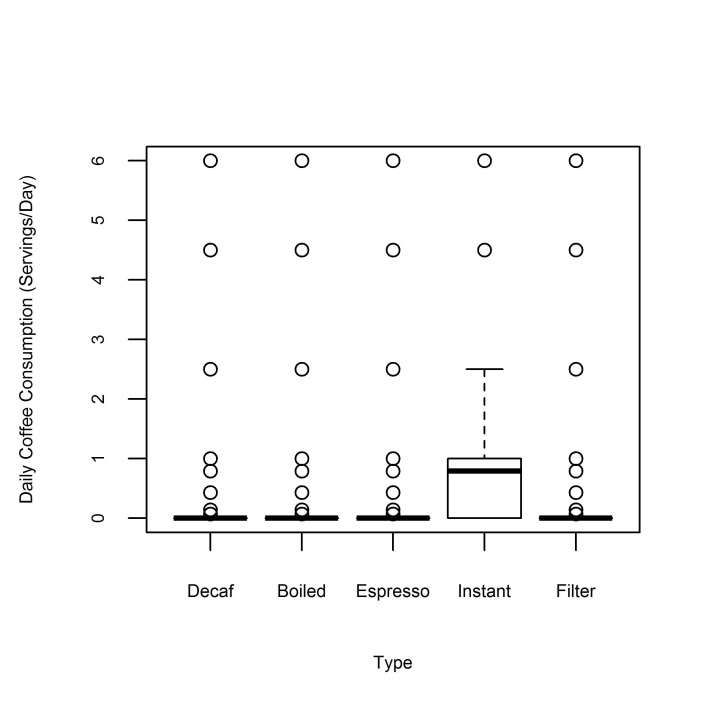

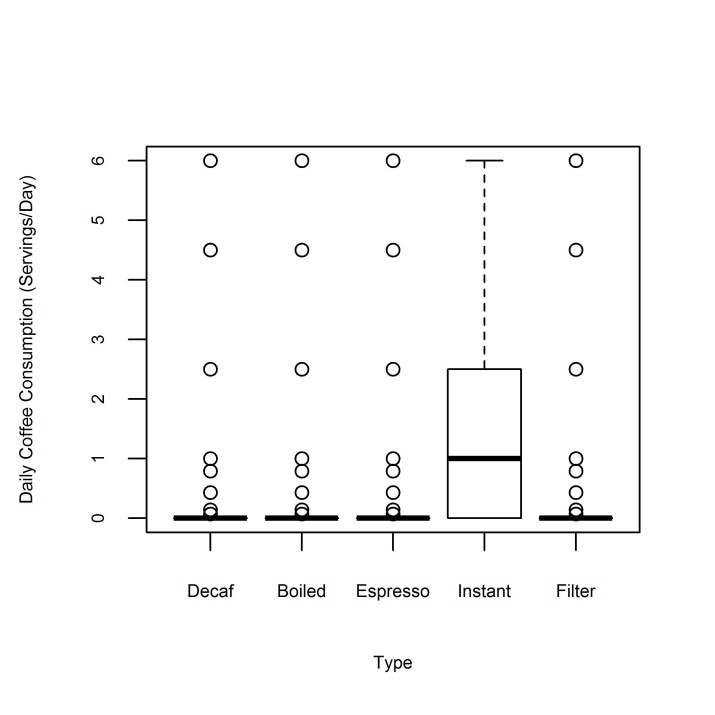


**B**

**A**


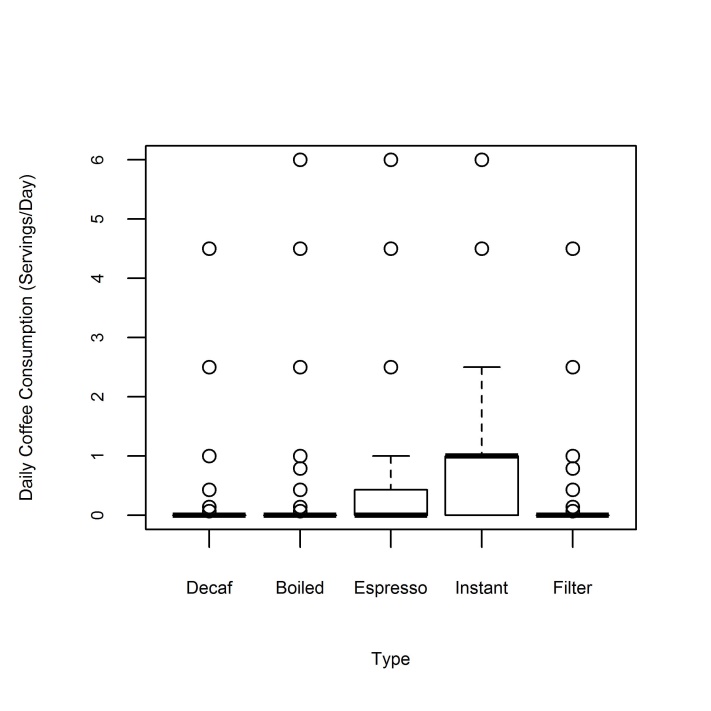

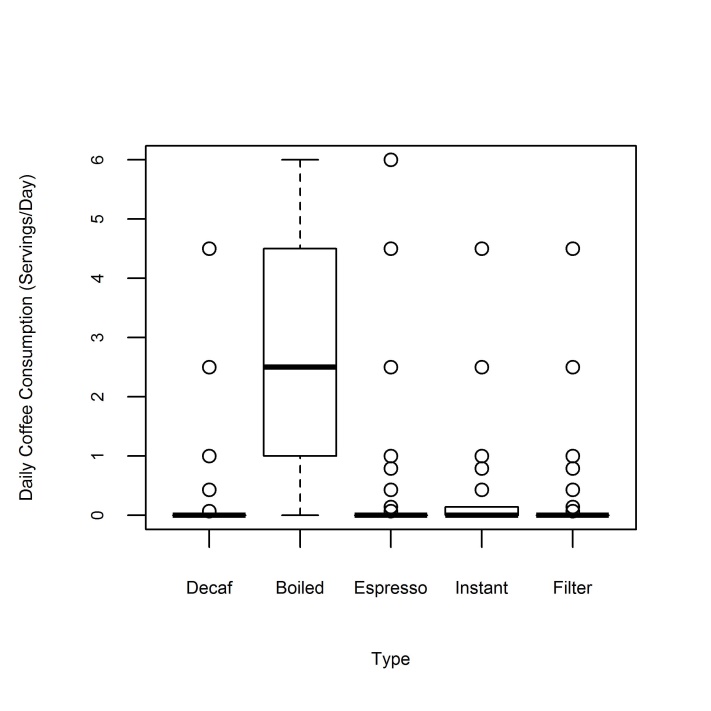


**D**

**C**

Supplementary Figure 1. Consumption patterns of different coffee types in A) the total MECC sample, B) Ashkenazi Jews, C) Sephardi Jews, and D) Arabs.
